# Supplementary material for: Fabrication, Optimization, and Characterization of Antibacterial Electrospun Shellac Fibers Loaded with Kaempferia parviflora Extract
Source: MDPI journal article supplement (doi:10.3390/pharmaceutics15010123), 2022-12-29
Supplement: s1 [file s1]

# Supplementary Materials: Fabrication, Optimization, and Characterization of Antibacterial Electrospun Shellac Fibers Loaded with *Kaempferia parviflora* Extract

Wantanwa Krongrawa, Sontaya Limmatvapirat, Mont Kumpugdee Vollrath, Prasat Kittakoop, Supachai Saibua and Chutima Limmatvapirat

**Table S1.** Experimental design matrix and corresponding responses based on experimental runs proposed by BBD design.

| Run | Factor 1<br>( $x_1$ )        | Factor 2 ( $x_2$ )  | Factor 3 ( $x_3$ )         | Factor 4<br>( $x_4$ )        | Response 1                       | Response 2                        |
|-----|------------------------------|---------------------|----------------------------|------------------------------|----------------------------------|-----------------------------------|
|     | Shellac<br>concentration (%) | Feed rate<br>(mL/h) | Electrical<br>voltage (kV) | Extract<br>concentration (%) | Fiber diameters<br>(nm), $n = 3$ | Bead-to-fiber ratio, $n$<br>$= 3$ |
|     | $w/w$                        |                     |                            | $w/w$                        | Mean $\pm$ SD                    | Mean $\pm$ SD                     |
| 1   | 38                           | 0.8                 | 18                         | 3                            | 832 $\pm$ 6.07                   | 0.24 $\pm$ 0.06                   |
| 2   | 38                           | 0.8                 | 24                         | 1                            | 824 $\pm$ 7.56                   | 0.32 $\pm$ 0.07                   |
| 3   | 38                           | 0.4                 | 18                         | 1                            | 635 $\pm$ 8.40                   | 0.41 $\pm$ 0.03                   |
| 4   | 36                           | 0.8                 | 18                         | 5                            | 724 $\pm$ 8.88                   | 0.42 $\pm$ 0.01                   |
| 5   | 36                           | 1.2                 | 18                         | 3                            | 495 $\pm$ 9.14                   | 0.58 $\pm$ 0.02                   |
| 6   | 40                           | 0.4                 | 18                         | 3                            | 915 $\pm$ 9.23                   | 0.04 $\pm$ 0.03                   |
| 7   | 38                           | 0.8                 | 12                         | 1                            | 606 $\pm$ 9.20                   | 0.30 $\pm$ 0.02                   |
| 8   | 40                           | 0.8                 | 18                         | 1                            | 819 $\pm$ 9.06                   | 0.14 $\pm$ 0.01                   |
| 9   | 40                           | 0.8                 | 18                         | 5                            | 1149 $\pm$ 16.65                 | 0.07 $\pm$ 0.01                   |
| 10  | 40                           | 0.8                 | 24                         | 3                            | 962 $\pm$ 9.29                   | 0.12 $\pm$ 0.02                   |
| 11  | 40                           | 0.8                 | 12                         | 3                            | 864 $\pm$ 12.72                  | 0.10 $\pm$ 0.01                   |
| 12  | 38                           | 0.4                 | 24                         | 3                            | 807 $\pm$ 5.81                   | 0.26 $\pm$ 0.02                   |
| 13  | 40                           | 1.2                 | 18                         | 3                            | 878 $\pm$ 6.92                   | 0.08 $\pm$ 0.00                   |
| 14  | 38                           | 0.8                 | 18                         | 3                            | 766 $\pm$ 8.11                   | 0.27 $\pm$ 0.03                   |
| 15  | 36                           | 0.4                 | 18                         | 3                            | 475 $\pm$ 9.12                   | 0.42 $\pm$ 0.06                   |
| 16  | 38                           | 1.2                 | 18                         | 1                            | 473 $\pm$ 3.02                   | 0.23 $\pm$ 0.04                   |
| 17  | 38                           | 1.2                 | 24                         | 3                            | 788 $\pm$ 6.94                   | 0.11 $\pm$ 0.02                   |
| 18  | 38                           | 1.2                 | 18                         | 5                            | 954 $\pm$ 12.20                  | 0.15 $\pm$ 0.03                   |
| 19  | 38                           | 1.2                 | 12                         | 3                            | 728 $\pm$ 10.21                  | 0.25 $\pm$ 0.04                   |
| 20  | 38                           | 0.4                 | 18                         | 5                            | 1015 $\pm$ 29.34                 | 0.28 $\pm$ 0.02                   |
| 21  | 38                           | 0.8                 | 24                         | 5                            | 902 $\pm$ 25.32                  | 0.21 $\pm$ 0.04                   |
| 22  | 36                           | 0.8                 | 18                         | 1                            | 433 $\pm$ 4.02                   | 0.86 $\pm$ 0.02                   |
| 23  | 38                           | 0.8                 | 18                         | 3                            | 785 $\pm$ 4.86                   | 0.30 $\pm$ 0.03                   |
| 24  | 36                           | 0.8                 | 24                         | 3                            | 527 $\pm$ 7.43                   | 0.81 $\pm$ 0.05                   |
| 25  | 36                           | 0.8                 | 12                         | 3                            | 524 $\pm$ 8.83                   | 0.78 $\pm$ 0.06                   |
| 26  | 38                           | 0.8                 | 12                         | 5                            | 545 $\pm$ 9.19                   | 0.29 $\pm$ 0.02                   |
| 27  | 38                           | 0.4                 | 12                         | 3                            | 667 $\pm$ 14.45                  | 0.38 $\pm$ 0.04                   |

**Table S2.** ANOVA results for the prediction of fiber diameter and bead-to-fiber ratio of electrospun shellac fibers using the BBD matrix.

| Source                               | Coefficients | <i>p</i> -value | Standard deviation | % CV  | Adequate precision | R <sup>2</sup> | F-value |
|--------------------------------------|--------------|-----------------|--------------------|-------|--------------------|----------------|---------|
| Y <sub>1</sub> (diameter)            |              |                 | 89.83              | 12.07 | 18.836             | 0.7983         |         |
| x <sub>1</sub>                       | 200.66       | < 0.0001        |                    |       |                    |                |         |
| x <sub>2</sub>                       | 72.96        | 0.0099          |                    |       |                    |                |         |
| x <sub>4</sub>                       | 124.97       | < 0.0001        |                    |       |                    |                |         |
| Intercept                            | 744.07       |                 |                    |       |                    |                |         |
| Model                                |              | < 0.0001        |                    |       |                    |                | 30.34   |
| Lack of fit                          |              | 0.1245          |                    |       |                    |                | 7.47    |
| Y <sub>2</sub> (bead-to-fiber ratio) |              |                 | 0.11               | 35.76 | 18.598             | 0.7652         |         |
| x <sub>1</sub>                       | -0.28        | < 0.0001        |                    |       |                    |                |         |
| x <sub>4</sub>                       | -0.07        | 0.0408          |                    |       |                    |                |         |
| Intercept                            | 0.31         |                 |                    |       |                    |                |         |
| Model                                |              | < 0.0001        |                    |       |                    |                | 39.10   |
| Lack of fit                          |              | 0.0643          |                    |       |                    |                | 14.99   |

**Table S3.** Verification of experimental results in relation to the predicted values generated by the designed models.

| Run | Fiber diameters (nm) |                                           |                    | Bead-to-fiber ratios |                                           |                    |
|-----|----------------------|-------------------------------------------|--------------------|----------------------|-------------------------------------------|--------------------|
|     | Predictive value     | Acceptable interval (95% confident level) | Experimental value | Predictive value     | Acceptable interval (95% confident level) | Experimental value |
| 1   |                      |                                           | 582.00             |                      |                                           | 0.43               |
| 2   | 574.71               | 504.83-                                   | 589.00             | 0.34                 | 0.10-0.57                                 | 0.29               |
| 3   |                      | 633.30                                    | 573.00             |                      |                                           | 0.33               |

**Table S4.** Hot-stage microscope (HSM) images of shellac flakes and fibers at elevated temperatures.

| Temperature<br>(°C) | HSM images                                                                          |                                                                                      |
|---------------------|-------------------------------------------------------------------------------------|--------------------------------------------------------------------------------------|
|                     | Shellac flakes                                                                      | Shellac fibers                                                                       |
| 50                  | 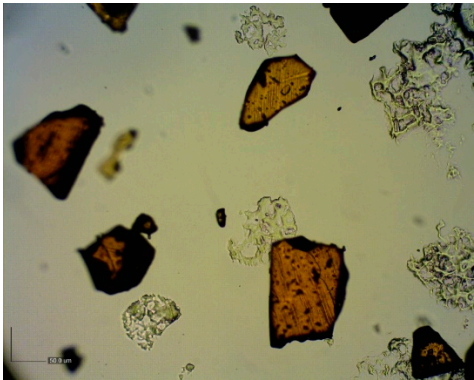   |    |
| 60                  |   |   |
| 70                  |  |  |

**Table S5.** Total methoxyflavones release kinetics models of KP extract-loaded electrospun shellac fibers with various formulations.

| Modelling       | Formulation                  | Parameters                      | R <sup>2</sup> Adjusted | AIC     | MSC     |
|-----------------|------------------------------|---------------------------------|-------------------------|---------|---------|
| Zero-order      | 36% (w/w) Shellac (Run 5)    | $k_0 = 0.658$                   | 0.6261                  | 33.9314 | 0.5837  |
|                 | 38% (w/w) Shellac (Run 1)    | $k_0 = 0.362$                   | 0.8586                  | 29.3385 | 1.5559  |
|                 | 40% (w/w) Shellac (Run 10)   | $k_0 = 0.279$                   | 0.7723                  | 23.8660 | 1.0799  |
|                 | 1% (w/w) KP extract (Run 8)  | $k_0 = 0.707$                   | 0.7320                  | 32.7120 | 0.9168  |
|                 | 3% (w/w) KP extract (Run 13) | $k_0 = 0.717$                   | 0.9303                  | 27.1213 | 2.2633  |
|                 | 5% (w/w) KP extract (Run 9)  | $k_0 = 0.548$                   | 0.1348                  | 34.5053 | -0.2552 |
|                 | Run optimized                | $k_0 = 0.615$                   | 0.7643                  | 31.5195 | 1.0452  |
| First-order     | 36% (w/w) Shellac (Run 5)    | $k_1 = 0.011$                   | 0.8456                  | 30.0709 | 1.3558  |
|                 | 38% (w/w) Shellac (Run 1)    | $k_1 = 0.005$                   | 0.8301                  | 30.8168 | 1.2602  |
|                 | 40% (w/w) Shellac (Run 10)   | $k_1 = 0.003$                   | 0.8474                  | 21.8649 | 1.4802  |
|                 | 1% (w/w) KP extract (Run 8)  | $k_1 = 0.012$                   | 0.9643                  | 22.6377 | 2.9317  |
|                 | 3% (w/w) KP extract (Run 13) | $k_1 = 0.012$                   | 0.9413                  | 25.6829 | 2.3226  |
|                 | 5% (w/w) KP extract (Run 9)  | $k_1 = 0.008$                   | 0.6404                  | 30.1149 | 0.6228  |
|                 | Run optimized                | $k_1 = 0.009$                   | 0.9037                  | 27.6057 | 1.8279  |
| Higuchi         | 36% (w/w) Shellac (Run 5)    | $k_H = 6.166$                   | 0.8683                  | 28.7122 | 1.6275  |
|                 | 38% (w/w) Shellac (Run 1)    | $k_H = 3.948$                   | 0.7251                  | 32.6617 | 0.8913  |
|                 | 40% (w/w) Shellac (Run 10)   | $k_H = 2.594$                   | 0.8548                  | 21.6160 | 1.5299  |
|                 | 1% (w/w) KP extract (Run 8)  | $k_H = 6.605$                   | 0.9303                  | 25.9781 | 2.2336  |
|                 | 3% (w/w) KP extract (Run 13) | $k_H = 6.606$                   | 0.9096                  | 28.4231 | 2.0030  |
|                 | 5% (w/w) KP extract (Run 9)  | $k_H = 5.224$                   | 0.8553                  | 25.5361 | 1.5332  |
|                 | Run optimized                | $k_H = 5.724$                   | 0.8888                  | 27.7630 | 1.7965  |
| Kosmeyer-Peppas | 36% (w/w) Shellac (Run 5)    | $k_{KP} = 4.217$<br>$n = 0.698$ | 0.8995                  | 27.3629 | 1.8974  |
|                 | 38% (w/w) Shellac (Run 1)    | $k_{KP} = 0.830$<br>$n = 0.612$ | 0.8859                  | 28.2652 | 1.7706  |
|                 | 40% (w/w) Shellac (Run 10)   | $k_{KP} = 1.242$<br>$n = 0.669$ | 0.8684                  | 21.6875 | 1.5156  |
|                 | 1% (w/w) KP extract (Run 8)  | $k_{KP} = 4.060$<br>$n = 0.612$ | 0.9643                  | 20.8333 | 3.5210  |
|                 | 3% (w/w) KP extract (Run 13) | $k_{KP} = 2.245$<br>$n = 0.747$ | 0.9957                  | 13.7837 | 4.9309  |
|                 | 5% (w/w) KP extract (Run 9)  | $k_{KP} = 6.387$<br>$n = 0.554$ | 0.9815                  | 13.2558 | 1.1850  |
|                 | Run optimized                | $k_{KP} = 3.012$<br>$n = 0.647$ | 0.9519                  | 23.5706 | 2.6350  |

Note: The significance of **bold** reveals the estimated parameters derived from the best-fit mathematical model.

**Table S6.** Antimicrobial activity of KP extract-loaded electrospun shellac fibers as determined by time-kill kinetics assay.

|                  |                         | Time (min)                                                                          |                                                                                      |                                                                                       |
|------------------|-------------------------|-------------------------------------------------------------------------------------|--------------------------------------------------------------------------------------|---------------------------------------------------------------------------------------|
|                  |                         | 15                                                                                  | 30                                                                                   | 60                                                                                    |
| <i>S. aureus</i> | Digital image           | 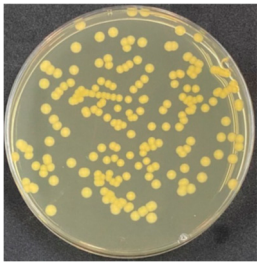   |    |    |
|                  | Microbial load (CFU/mL) | $1.09 \times 10^6$                                                                  | $1.87 \times 10^6$                                                                   | $1.18 \times 10^6$                                                                    |
|                  | R (%)                   | -                                                                                   | -                                                                                    | -                                                                                     |
|                  |                         | Time (min)                                                                          |                                                                                      |                                                                                       |
|                  |                         | 120                                                                                 | 240                                                                                  | 360                                                                                   |
|                  | Digital image           |   |   |   |
|                  | Microbial load (CFU/mL) | $7.80 \times 10^5$                                                                  | $1.60 \times 10^5$                                                                   | $1.30 \times 10^5$                                                                    |
|                  | R (%)                   | 28.44                                                                               | 85.32                                                                                | 88.07                                                                                 |
|                  |                         | Time (min)                                                                          |                                                                                      |                                                                                       |
|                  |                         | 15                                                                                  | 30                                                                                   | 60                                                                                    |
| <i>E. coli</i>   | Digital image           |  |  |  |
|                  | Microbial load (CFU/mL) | $1.09 \times 10^6$                                                                  | $1.62 \times 10^6$                                                                   | $2.62 \times 10^6$                                                                    |
|                  | R (%)                   | -                                                                                   | -                                                                                    | -                                                                                     |
|                  |                         | Time (min)                                                                          |                                                                                      |                                                                                       |
|                  |                         | 120                                                                                 | 240                                                                                  | 360                                                                                   |
|                  | Digital image           |  |  |  |
|                  | Microbial load (CFU/mL) | $1.34 \times 10^6$                                                                  | $9.99 \times 10^5$                                                                   | $8.60 \times 10^5$                                                                    |
|                  | R (%)                   | -                                                                                   | 9.17                                                                                 | 21.10                                                                                 |



**Table S6 (continue).** Antimicrobial activity of KP extract-loaded electrospun shellac fibers as determined by time-kill kinetics assay.

|                      |                         | Time (min)                                                                         |                                                                                     |                                                                                      |
|----------------------|-------------------------|------------------------------------------------------------------------------------|-------------------------------------------------------------------------------------|--------------------------------------------------------------------------------------|
|                      |                         | 15                                                                                 | 30                                                                                  | 60                                                                                   |
| <i>P. aeruginosa</i> | Digital image           | 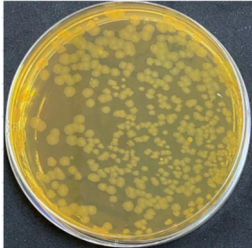  |    |   |
|                      | Microbial load (CFU/mL) | $3.24 \times 10^7$                                                                 | $3.56 \times 10^7$                                                                  | $3.60 \times 10^7$                                                                   |
|                      | R (%)                   | -                                                                                  | -                                                                                   | -                                                                                    |
|                      |                         |                                                                                    |                                                                                     |                                                                                      |
|                      |                         | Time (min)                                                                         |                                                                                     |                                                                                      |
|                      |                         | 120                                                                                | 240                                                                                 | 360                                                                                  |
| <i>P. aeruginosa</i> | Digital image           |  |  |  |
|                      | Microbial load (CFU/mL) | $5.71 \times 10^7$                                                                 | $5.75 \times 10^7$                                                                  | $5.82 \times 10^7$                                                                   |
|                      | R (%)                   | -                                                                                  | -                                                                                   | -                                                                                    |
|                      |                         |                                                                                    |                                                                                     |                                                                                      |

R, the value of antimicrobial activity (%).

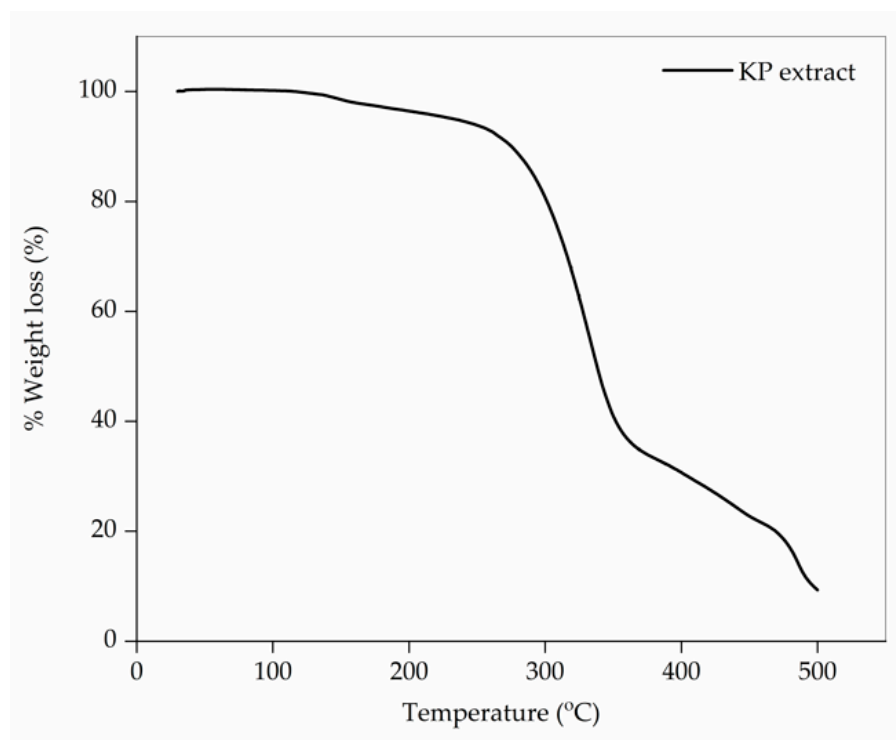

**Figure S1.** TGA thermogram of KP extract.

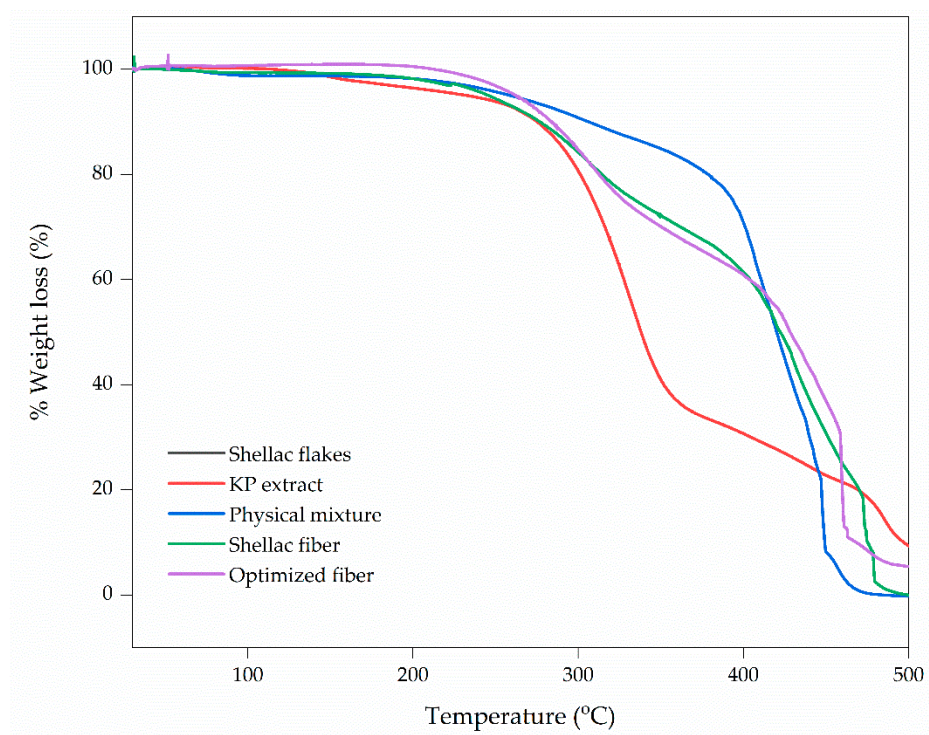

**Figure S2.** TGA thermograms of samples.

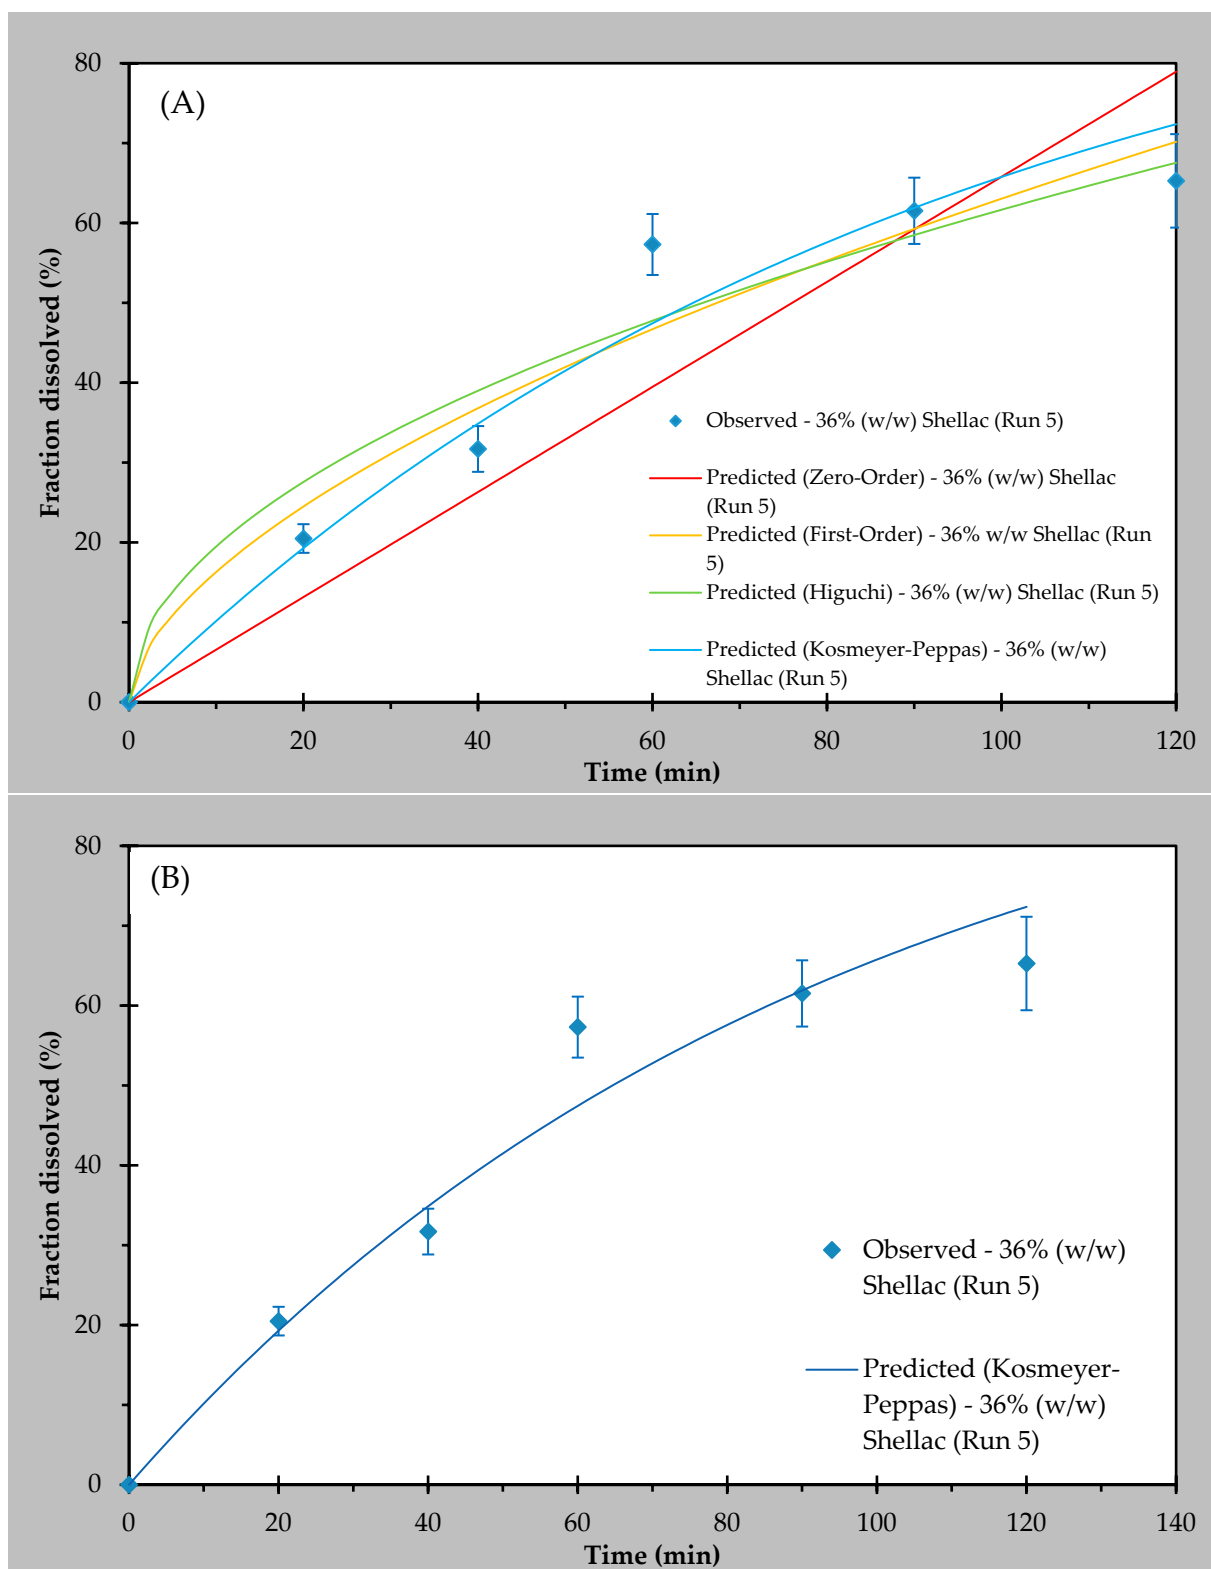

**Figure S3.** A mathematical model fits the KP extract release profiles of KP extract-loaded electrospun shellac fiber containing shellac and KP extract concentrations of 36% (*w/w*) and 3% (*w/w*), respectively: (A) All mathematical model fits, (B) The best fit model.



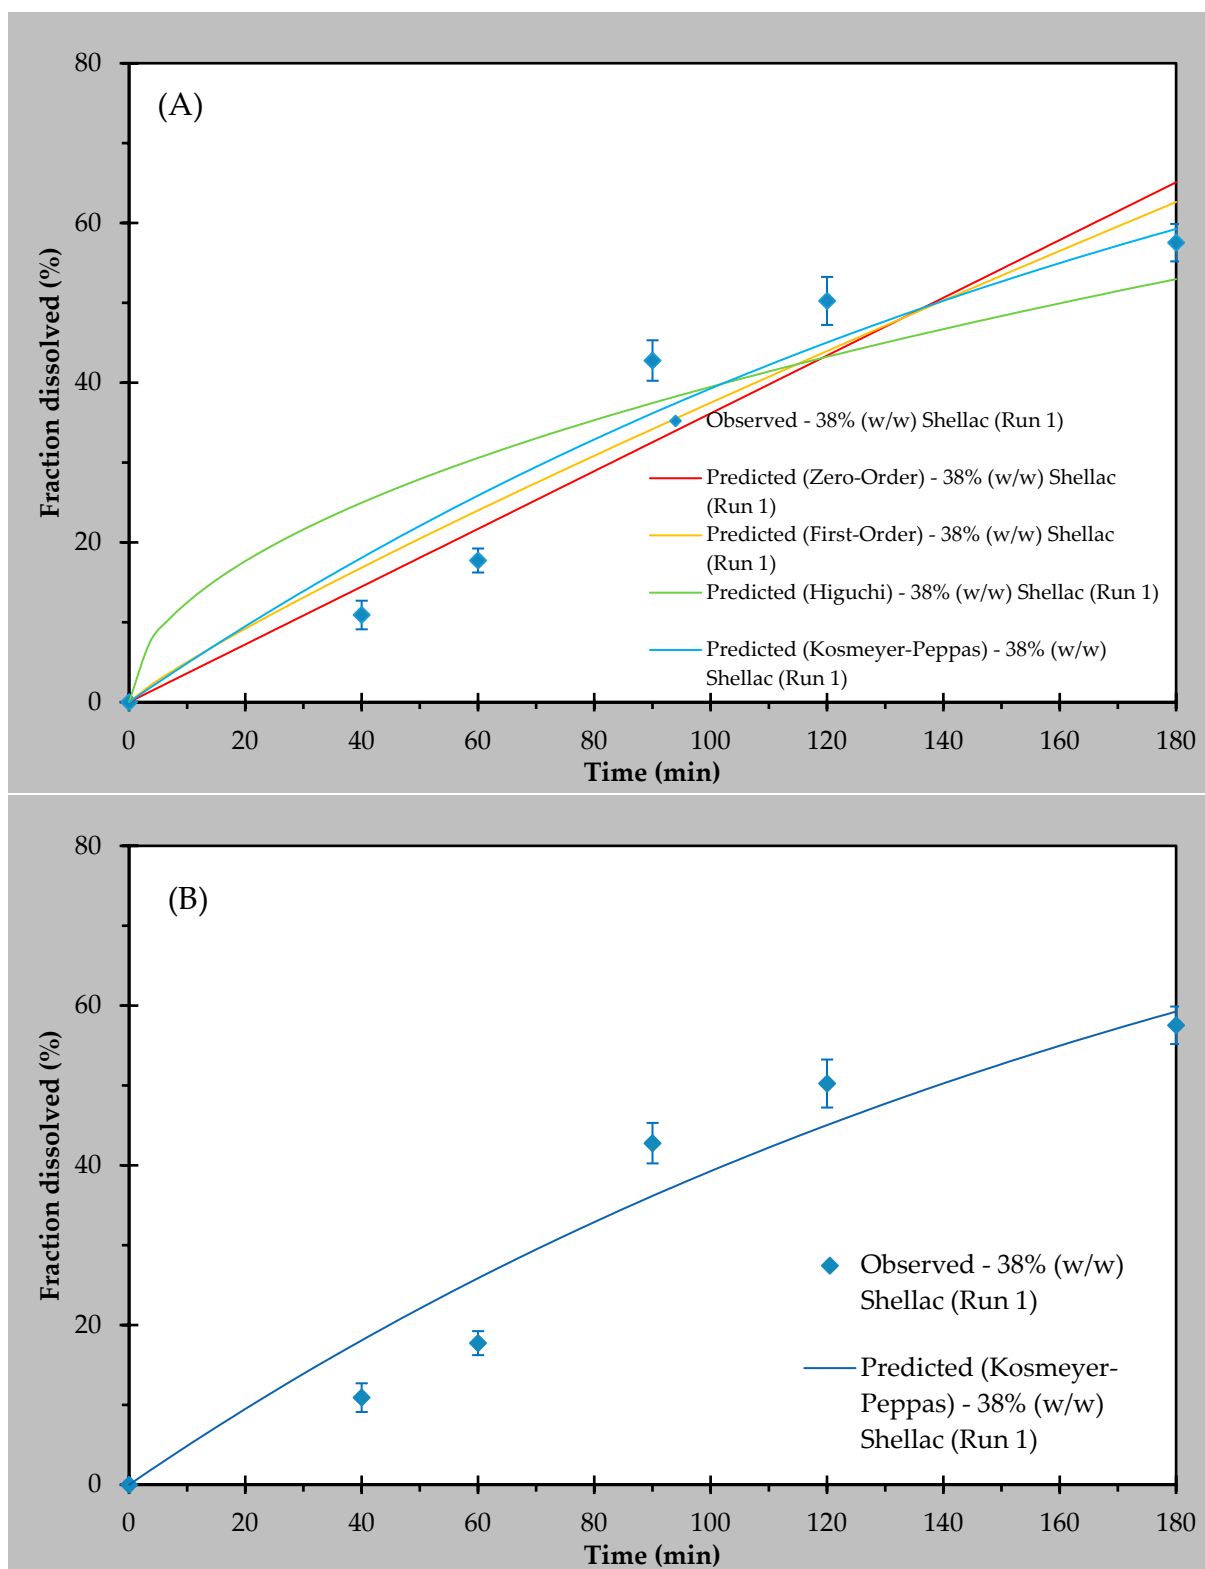

**Figure S4.** A mathematical model fits the KP extract release profiles of KP extract-loaded electrospun shellac fiber containing shellac and KP extract concentrations of 38% (*w/w*) and 3% (*w/w*), respectively: (A) All mathematical model fits, (B) The best fit model.

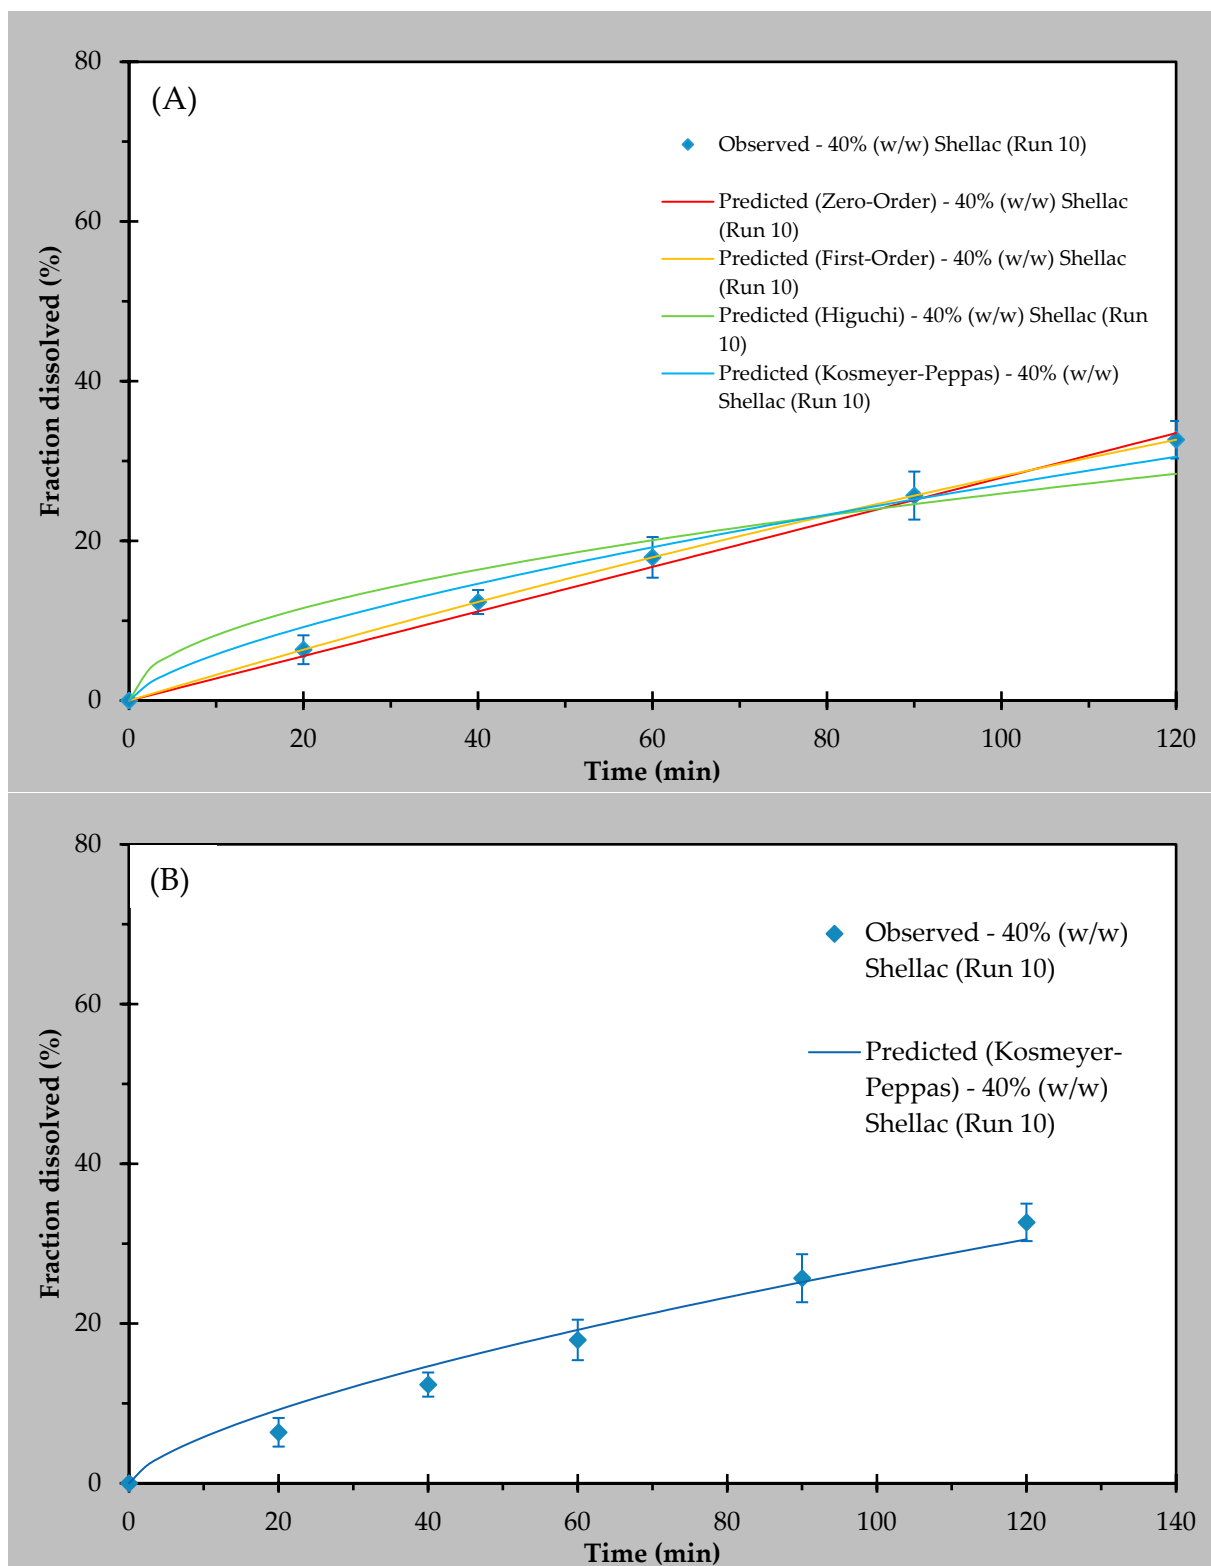

**Figure S5.** A mathematical model fits the KP extract release profiles of KP extract-loaded electrospun shellac fiber containing shellac and KP extract concentrations of 40% (w/w) and 3% (w/w), respectively: (A) All mathematical model fits, (B) The best fit model.

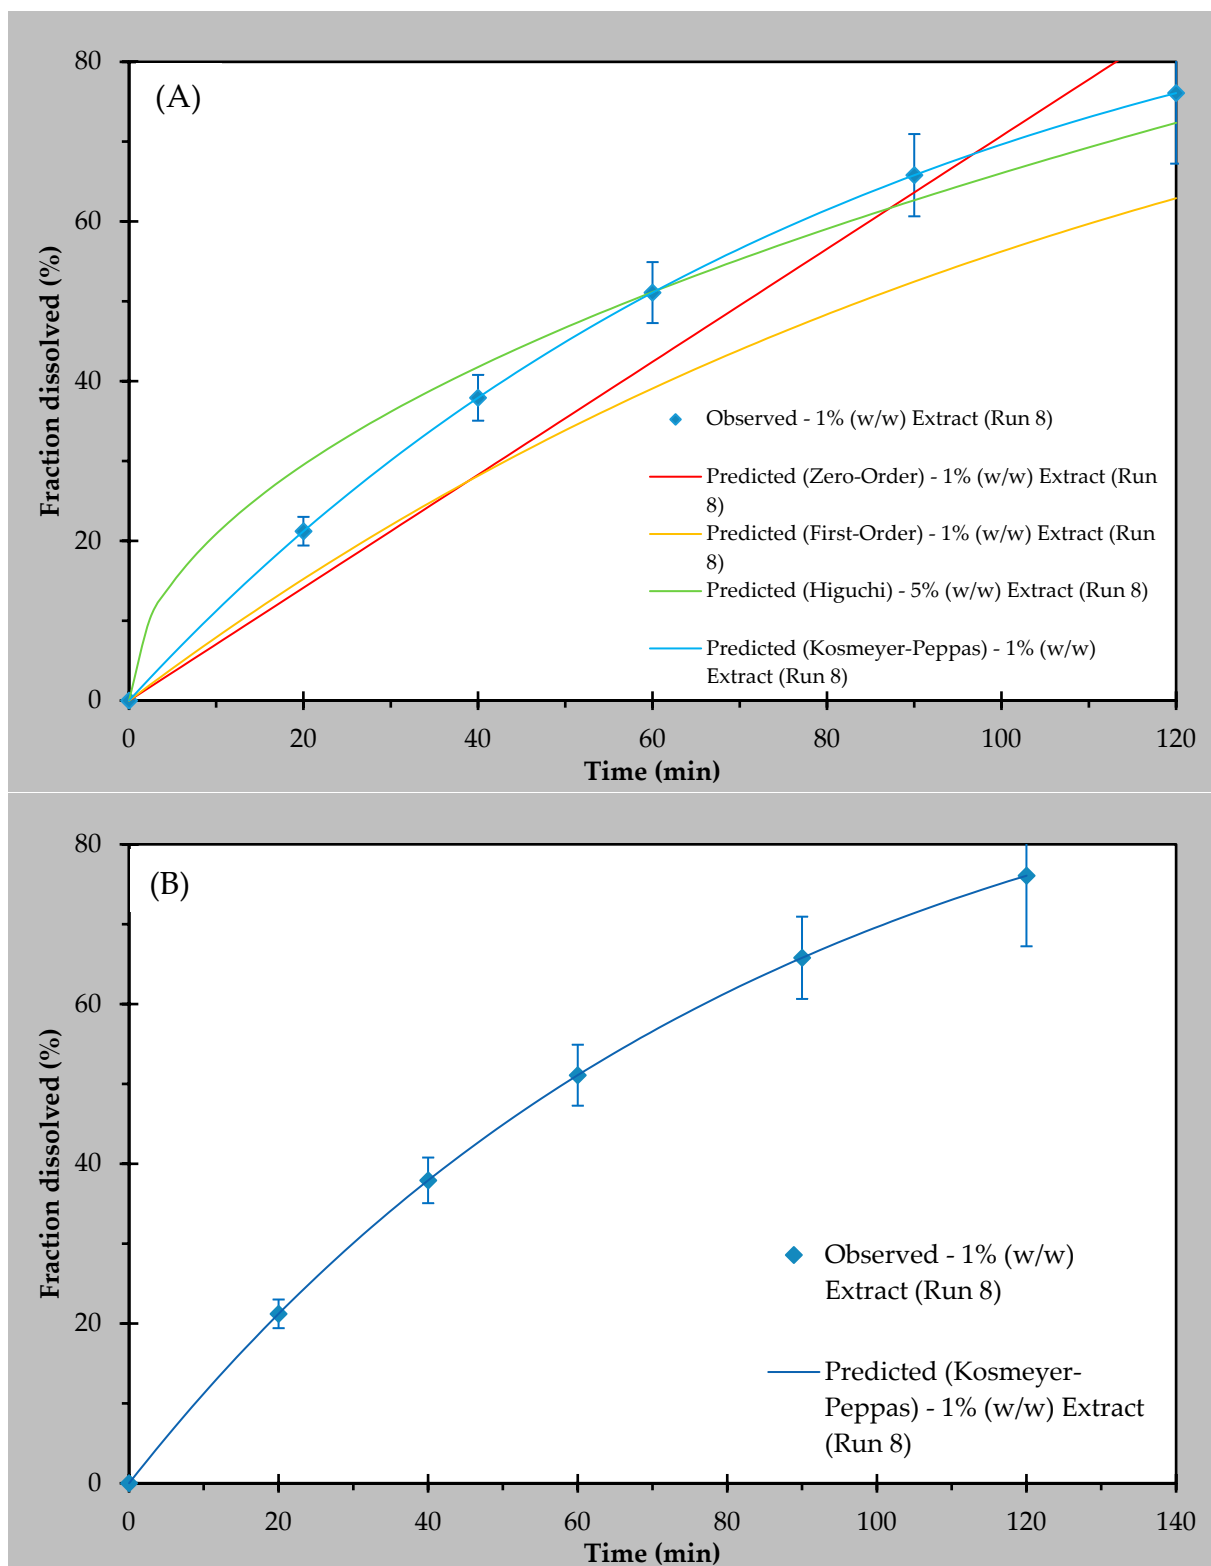

**Figure S6.** A mathematical model fits the KP extract release profiles of KP extract-loaded electrospun shellac fiber containing shellac and KP extract concentrations of 40% (w/w) and 1% (w/w), respectively: (A) All mathematical model fits, (B) The best fit model.

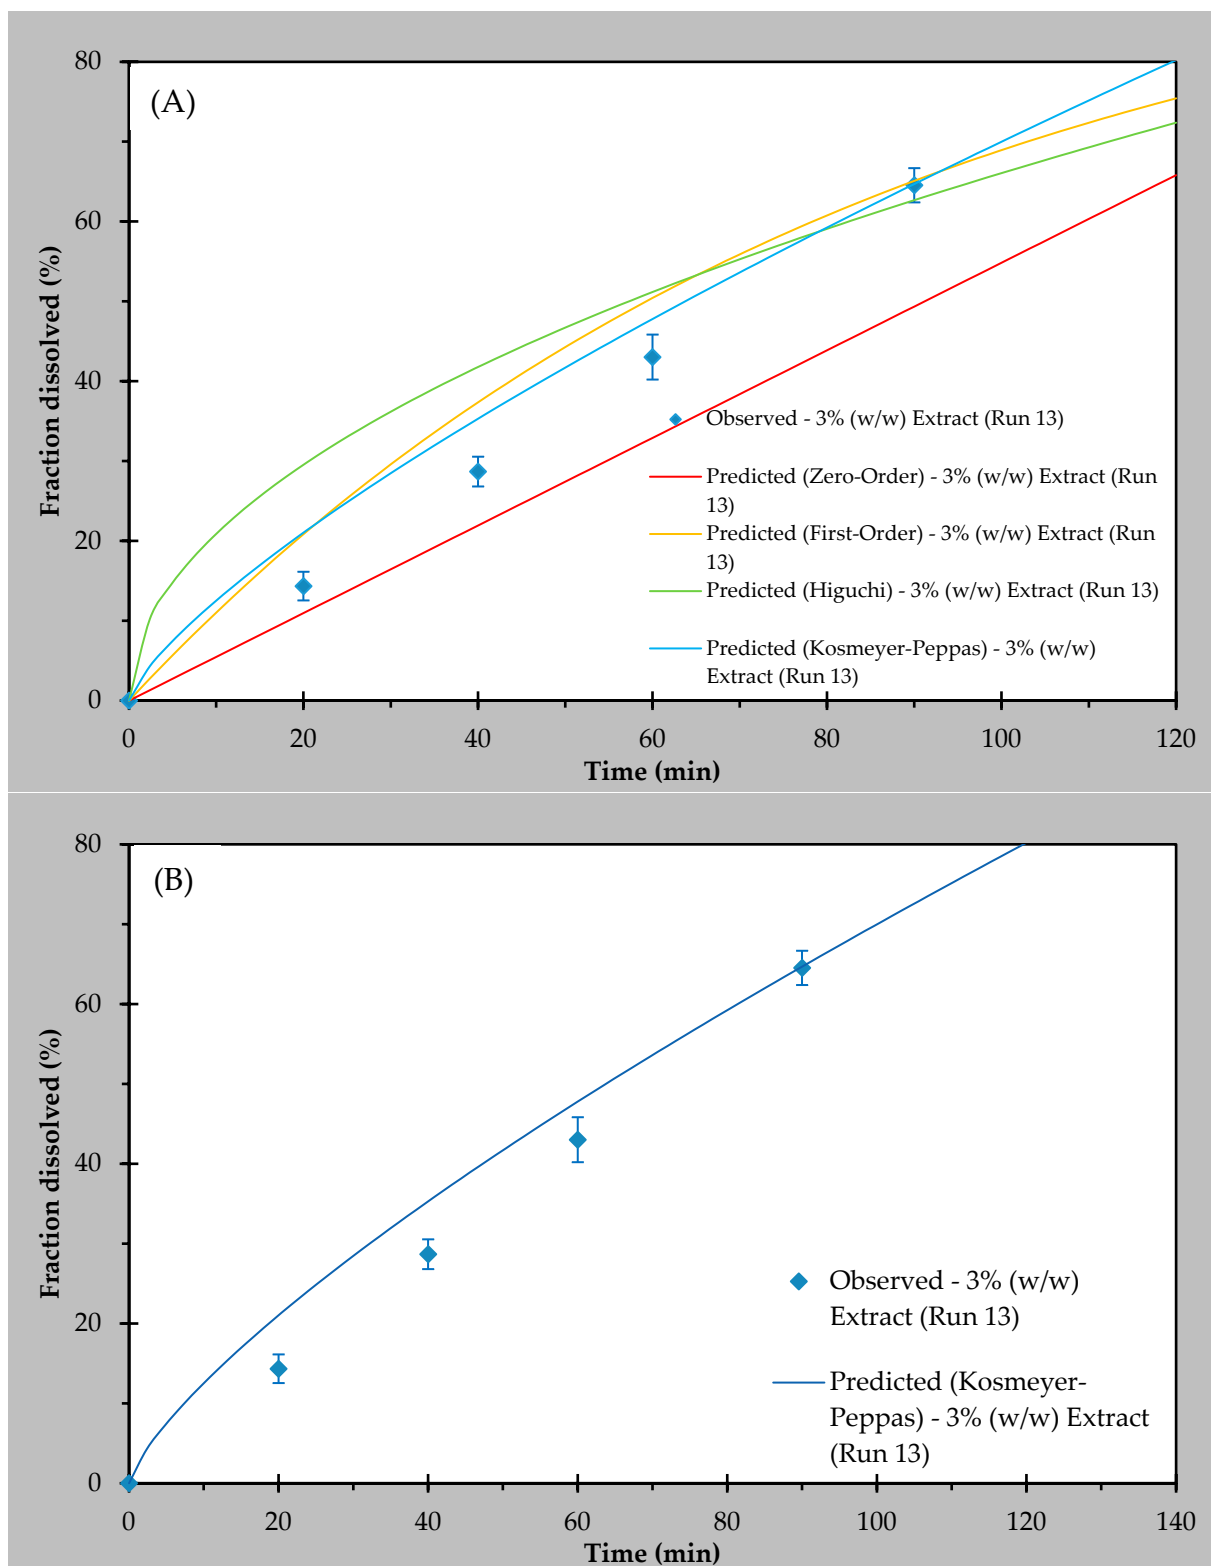

**Figure S7.** A mathematical model fits the KP extract release profiles of KP extract-loaded electrospun shellac fiber containing shellac and KP extract concentrations of 40% (*w/w*) and 3% (*w/w*), respectively: (A) All mathematical model fits, (B) The best fit model.

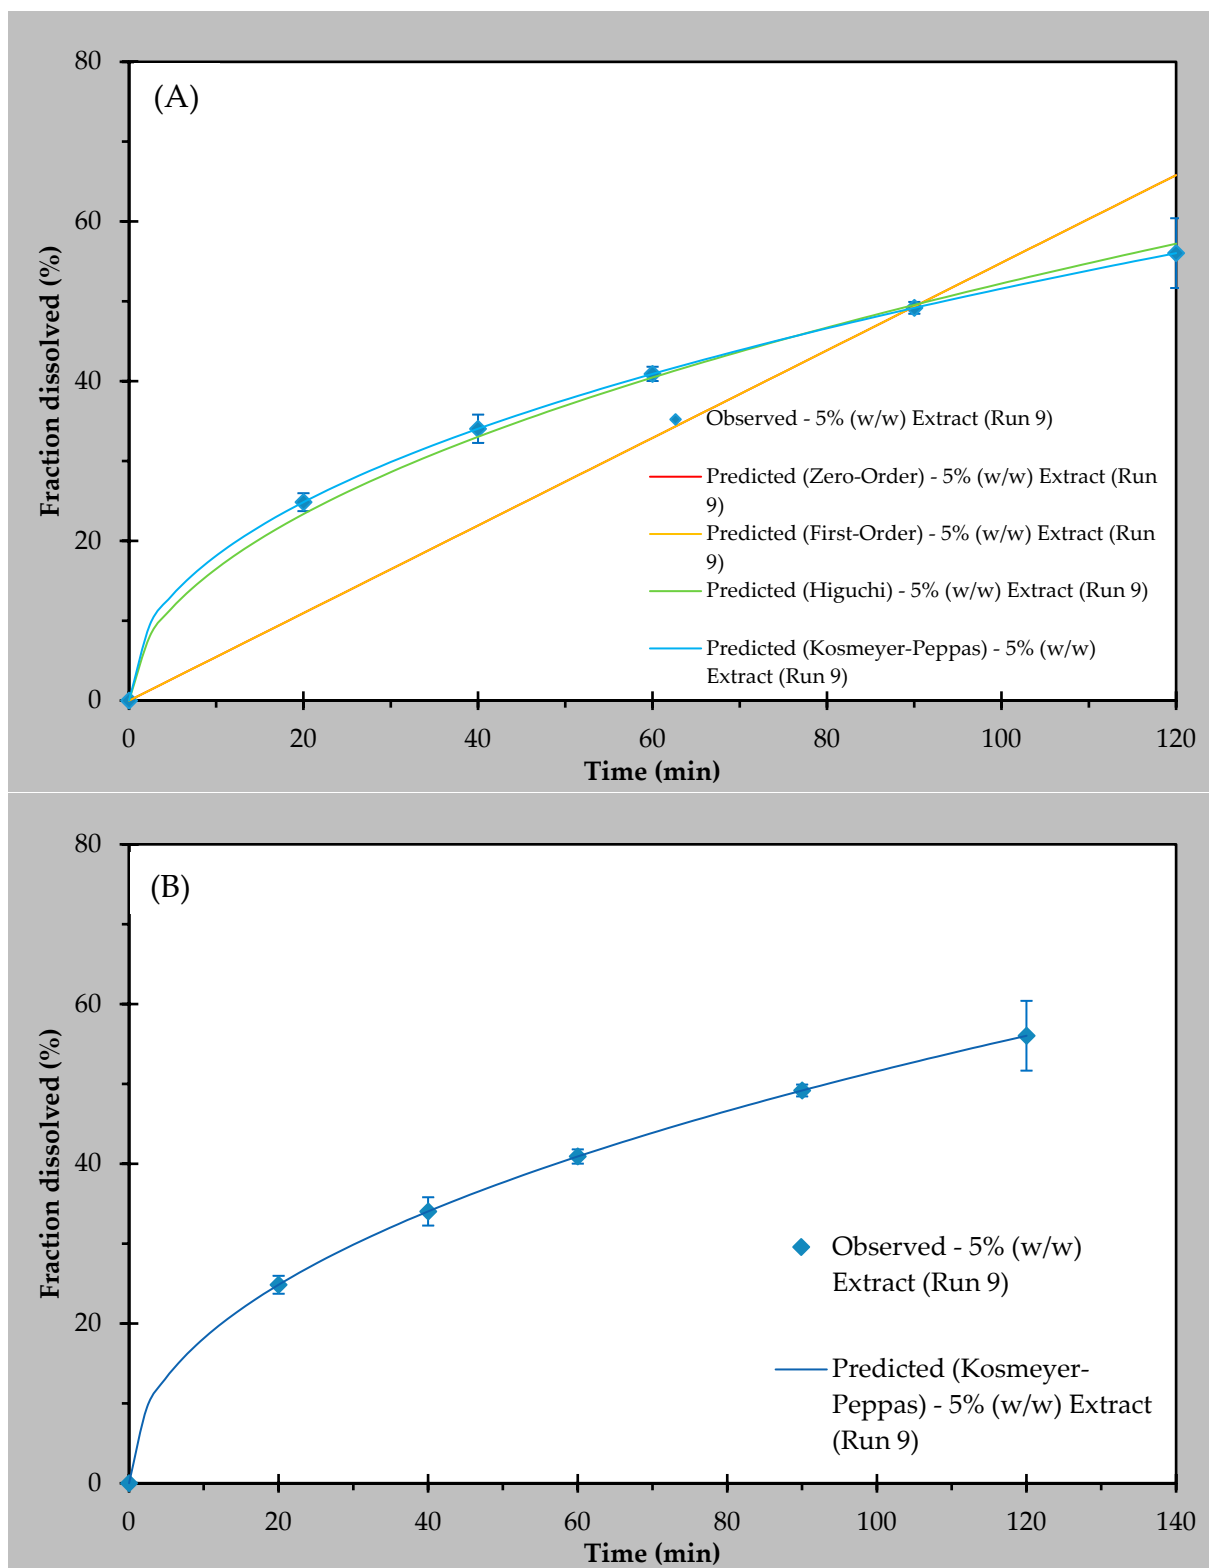

**Figure S8.** A mathematical model fits the KP extract release profiles of KP extract-loaded electrospun shellac fiber containing shellac and KP extract concentrations of 40% (*w/w*) and 5% (*w/w*), respectively: (A) All mathematical model fits, (B) The best fit model.



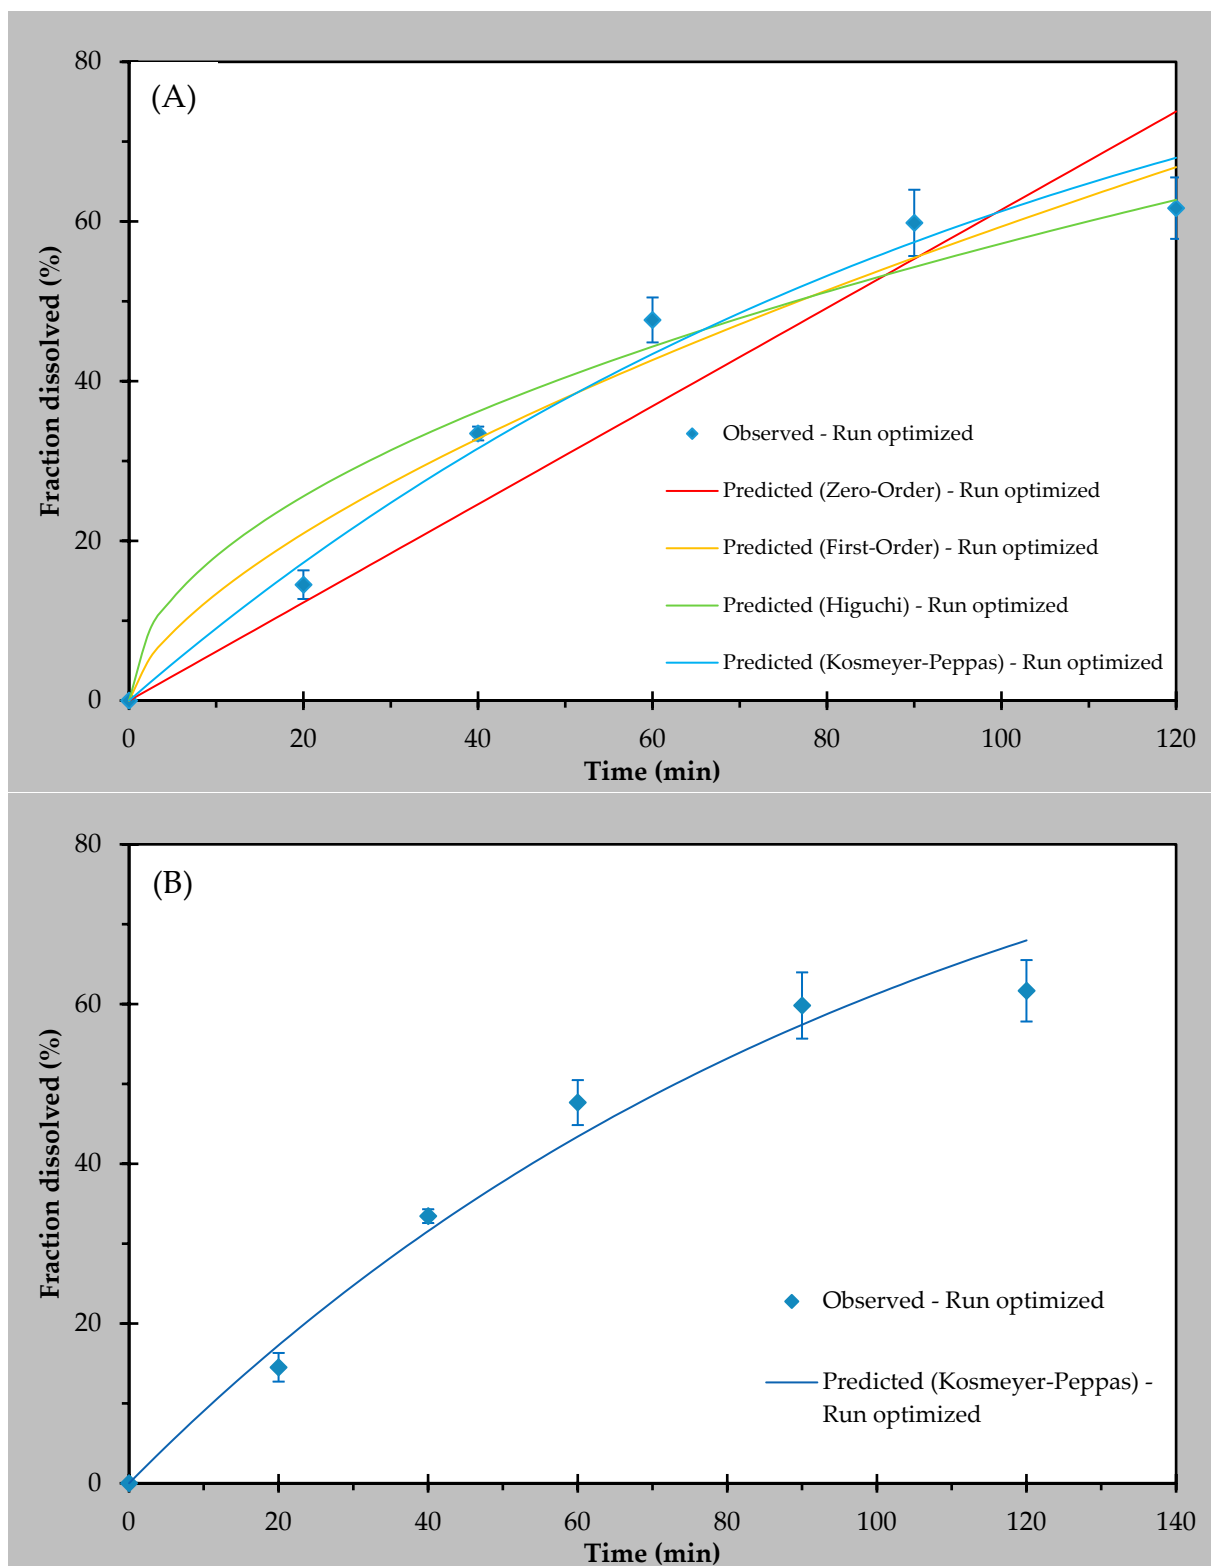

**Figure S9.** A mathematical model fits the KP extract release profiles of optimized KP extract-loaded electrospun shellac fiber containing shellac and KP extract concentrations of 37.25% (*w/w*) and 1.50% (*w/w*), respectively: (A) All mathematical model fits, (B) The best fit model.
